# Supplementary material
Source: PubMed Central journal article supplement (PMC8530857)
Supplement: NIHMS1721589-supplement-fS1-S6.pdf [file NIHMS1721589-supplement-fS1-S6.pdf]

## Supplemental Information

**Title:** Distinct brain regional proteome changes in the rTg-DI rat model of cerebral amyloid angiopathy

**Authors:** Joseph M. Schrader, Feng Xu, and William E. Van Nostrand

**Table S1.** Elevated proteins in the rTg-DI cortex ( $\geq 50\%$  increase,  $n = 6$ ,  $p < 0.05$ )

**Table S2.** Elevated proteins in the rTg-DI hippocampus ( $\geq 50\%$  increase,  $n = 6$ ,  $p < 0.05$ )

**Table S3.** Elevated proteins in the rTg-DI thalamus ( $\geq 50\%$  increase,  $n = 6$ ,  $p < 0.05$ )

**Table S4.** Top thirty elevated proteins common to all three brain regions of rTg-DI rats

**Table S5.** Decreased proteins in the rTg-DI cortex ( $\geq 34\%$  decrease,  $n = 6$ ,  $p < 0.05$ )

**Table S6.** Decreased proteins in the rTg-DI hippocampus ( $\geq 34\%$  decrease,  $n = 6$ ,  $p < 0.05$ )

**Table S7.** Decreased proteins in the rTg-DI thalamus ( $\geq 34\%$  decrease,  $n = 6$ ,  $p < 0.05$ )

## Supplemental Methods

### Immunohistochemical analyses

Paraformaldehyde-fixed brain sections were cut in the sagittal plane at 10  $\mu\text{m}$  thickness using a microtome (Leica, Buffalo Grove, IL), placed on slides and then rehydrated by immersing in xylene with decreasing concentrations of ethanol. Antigen retrieval was conducted via 5 min incubation with proteinase K (IB05406, IBI Scientific, Peosta, IA) (0.2 mg/ml) at 22° C. Tissue sections were then blocked in Superblock blocking buffer (cat. #37518, ThermoFisher, Franklin, MA) containing 0.3% Triton X-100 at room temperature for 30 min and incubated with individual primary antibodies at the following dilutions overnight: rabbit polyclonal antibody to collagen IV to detect cerebral blood vessels (1:250, SD2365885, Invitrogen, Waltham, MA), goat polyclonal antibodies to glial fibrillary acidic protein (GFAP, 1:250, RRID: AB\_880202, Abcam, Cambridge,

MA) or ionized calcium-binding adapter molecule 1 (Iba-1, 1:250, RRID: AB\_521594, Novus, Centennial, CO) for detecting astrocytes and microglia, respectively or rabbit polyclonal antibody to Anax3 (PA5082483, Invitrogen, Waltham, MA). Primary antibodies were detected with Alexa Fluorescent 594 (RRID: AB\_141359, Molecular Probes, Leiden, Netherlands) or 488 (RRID: AB\_2535792, Invitrogen, Waltham, MA) -conjugated secondary antibodies (1:1000). Deposited fibrillar amyloid was detected with either thioflavin S (123H0598, Sigma-Aldrich, St. Louis, MO) or Amylo-Glo (TR-300-AG, Biosensis Inc., Thebarton, South Australia), as described by the manufacturer. Calcium staining was performed via the Von Kossa method as previously described (Rungby *et al.* 1993; Davis *et al.* 2018). Immunohistological images were captured on a KEYENCE BZ-X710 fluorescence microscope and analyzed with BZ-X Analyzer software (Version 1.3.1.1, 2013, Keyence, Itasca, IL).

### **Stereological counting of astrocytes and microglia**

The numbers of astrocytes and microglia in the cortex, hippocampus and thalamus in rTg-DI rats and wild-type rats at 12 months of age were determined using stereological principles (Long *et al.* 1998). The total numbers of microglia and astrocytes were estimated using the Stereologer software system (Systems Planning and Analysis). Every tenth section cut at 50  $\mu\text{m}$  was selected and generated 10-15 sections per reference space in a systematic-random manner. Immunopositive cells were counted using the optical fractionator method with the dissector principle and unbiased counting rules (Long *et al.* 1998). Criteria for counting cells required that cell bodies exhibited positive GFAP or Iba-1 immunostaining, for astrocytes or microglia respectively as previously described (Zhu *et al.* 2020).

## **Quantitative immunoblotting**

20 sagittal sections (25  $\mu$ m thick) of fresh frozen 12 M whole rat brain were lysed in RIPA buffer via sonication (12  $\times$  1 sec bursts) on ice, followed by 1 h incubation on ice, and samples were normalized to equal total protein concentrations. Sufficient 2 $\times$  SDS sample buffer (2% (w/v) SDS, 0.01% (w/v) bromphenol blue, 20 mM DTT, 50 mM Tris-HCl, pH6.8) was added to each sample for final concentration of 1 $\times$ . Proteins were resolved via SDS-PAGE and transferred to polyvinylidene difluoride (PVDF) membrane (Imobilon-FL, EMD Millipore, Billerica, MA). Gfap was detected by probing with an anti-GFAP rabbit polyclonal antibody (RRID: AB\_10013382, Dako, Glostrup, Denmark), Apoe was detected by probing with an anti-Apoe rabbit monoclonal antibody (RRID: AB\_2832971, Abcam, Cambridge, MA), Anxa3 was detected by probing with an anti-Anxa3 rabbit polyclonal antibody (PA5082483, Invitrogen, Waltham, MA), Aqp4 was detected by probing with an anti-Aqp4 rabbit polyclonal antibody RRID: AB\_1006038, Novus Biologicals, Littleton, CO), MBP was detected by probing with a previously validated affinity-purified goat polyclonal antibody, and  $\beta$ -actin was detected by probing with a mouse monoclonal anti- $\beta$ -actin (Sigma, A5441). All primary antibody dilutions were 1:5000, in 3% (w/v) BSA in PBS. Blots were then probed with appropriate horseradish peroxidase (HRP) - conjugated or fluorescent secondary antibodies (IRDye®, RRID: AB\_10953628, LI-COR, Lincoln, NE). HRP-catalyzed chemiluminescent signal was revealed using SuperSignal™West Femto Maximum Sensitivity Substrate (cat# 34096, ThermoFisher, Franklin, MA,) and both chemiluminescent and fluorescent signals were detected and quantified using an Odyssey Fc imager (LI-COR, Lincoln, NE).

## References

Davis J., Xu F., Hatfield J., Lee H., Hoos M. D., Popescu D., Crooks E., et al. (2018) A novel transgenic rat model of robust cerebral microvascular amyloid with prominent vasculopathy. *Am. J. Pathol.* **188**, 2877–2889.

Long J.M., Kalehua A.N., Muth N.J., Hengemihle J.M., Jucker M., Calhoun M.E., Ingram D.K., Mouton P.R.: (1998) Stereological estimation of total microglia number in mouse hippocampus. *J. Neurosci. Methods* **84**, 101-108.

Rungby J., Kassem M., Fink Eriksen E., Danscher G. (1993) The von Kossa reaction for calcium deposits: silver lactate staining increases sensitivity and reduces background. *Histochem J.* **25**, 446–451.

Zhu X., Hatfield J., Sullivan J. K., Xu F., Van Nostrand W. E. (2020) Robust neuroinflammation and perivascular pathology in rTg-DI rats, a novel model of microvascular cerebral amyloid angiopathy. *J. Neuroinflammation* **17**.

Supplemental Fig. S1

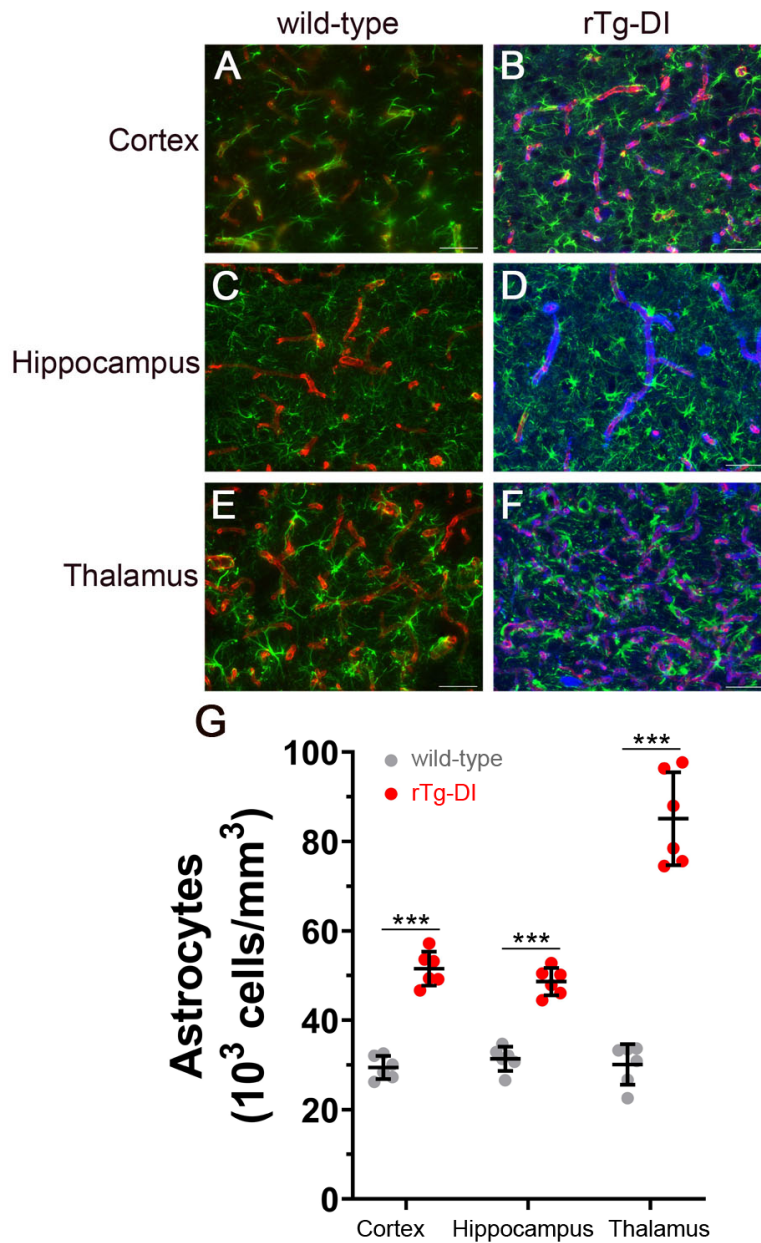

**SI Fig. S1. Increased perivascular astrocytes in rTg-DI rats.** Brain sections from 12 M wild-type rats (A,C,E) and rTg-DI rats (B,D,F) were labeled with Amylo-Glo to detect microvascular fibrillar amyloid (blue), goat polyclonal antibody to collagen IV to detect cerebral microvessels (red), and rabbit polyclonal antibody to GFAP to detect astrocytes (green). Scale bars = 50 μm.

(G) Quantitation of astrocyte numbers from rTg-DI rats (red circles) and wild-type rats (gray circles) in different brain regions at 12 months of age. Data points show the results from each rat and the group mean  $\pm$  SD of n=6 rTg-DI rats and n=6 WT rats. Compared to wild-type rats the astrocyte numbers were markedly elevated in rTg-DI rats at 12 months of age in each measured brain regions. \*\*\* P < 0.001.

## Supplemental Fig. S2

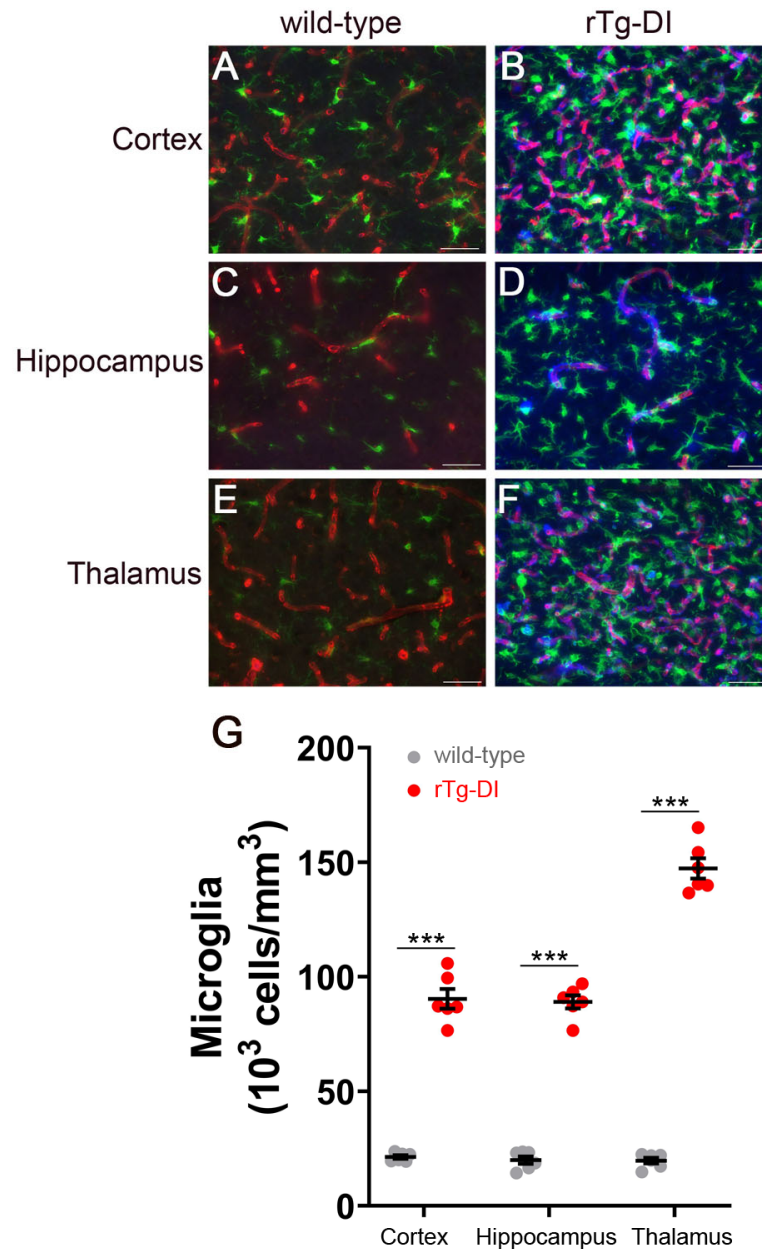

**SI Fig. S2. Elevated perivascular microglia in rTg-DI rats.** Brain sections from 12 M wild-type rats (A,C,E) and rTg-DI rats (B,D,F) were labeled with Amylo-Glo to detect microvascular fibrillar amyloid (blue), rabbit polyclonal antibody to collagen IV to detect cerebral microvessels (red), and goat polyclonal antibody Iba-1 to identify microglia (green). Scale bars = 50  $\mu\text{m}$ . (G)

Quantitation of microglia numbers from rTg-DI rats (red circles) and wild-type rats (gray circles) in different brain regions at 12 months of age. Data points show the results from each rat and the group mean  $\pm$  SD of n=6 rTg-DI rats and n=6 WT rats. Compared to wild-type rats the microglia numbers were markedly elevated in rTg-DI rats at 12 months of age in each measured brain regions. \*\*\*  $P < 0.001$ .



Supplemental Fig. S3

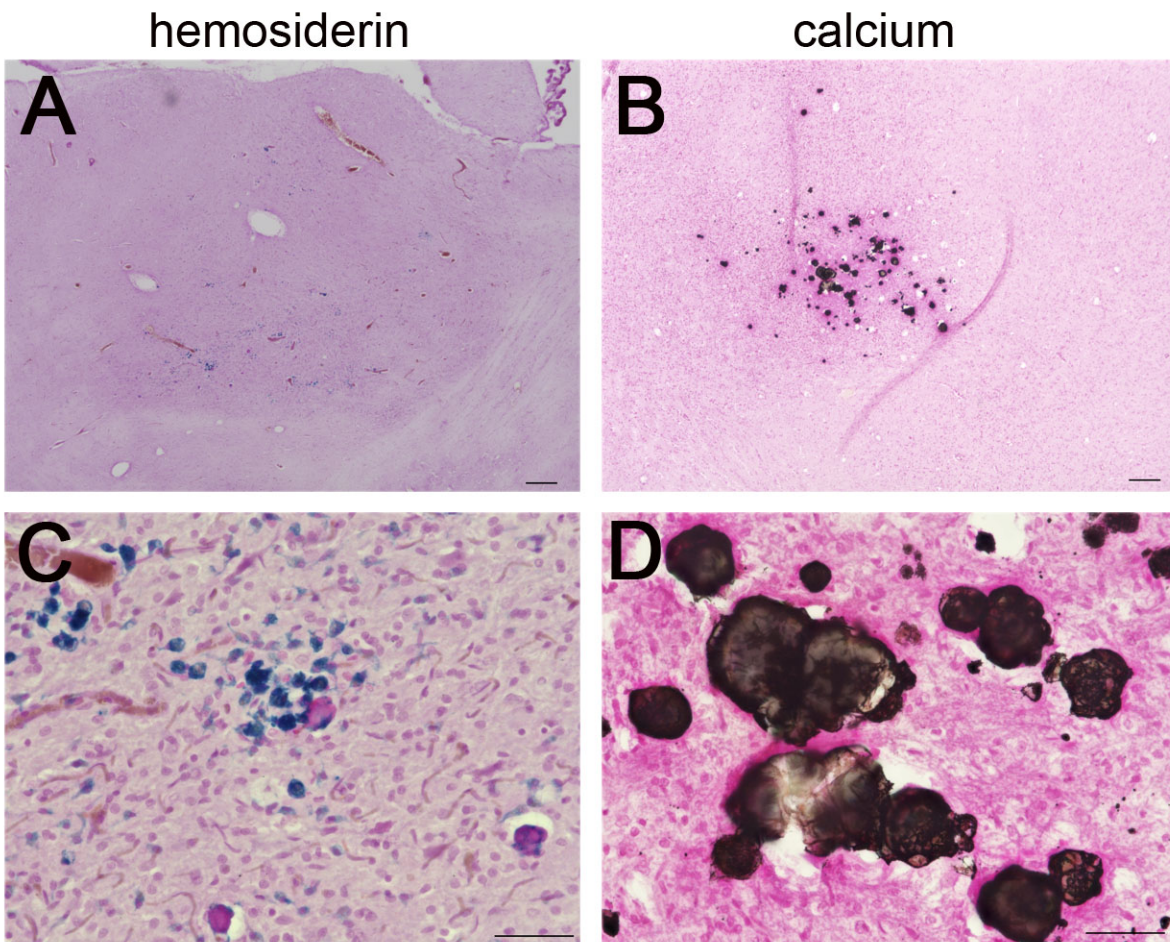

**SI Fig. S3. Prominent thalamic cerebral microbleeds and occluded microvessels in rTg-DI Rats.** Brain sections from the present cohort of 12 M rTg-DI rats were stained for hemosiderin to identify thalamic microbleeds (blue) (A,C) or stained for calcium using the von Kossa technique to identify thalamic occluded microvessels (black) (B,D). Scale bars = 200  $\mu\text{m}$  (A,B) and 50  $\mu\text{m}$  (C,D). Representative images show that consistent cerebral microbleeds and calcified, occluded vessels are observed localized in the thalamus.

**Supplemental Fig. S4**

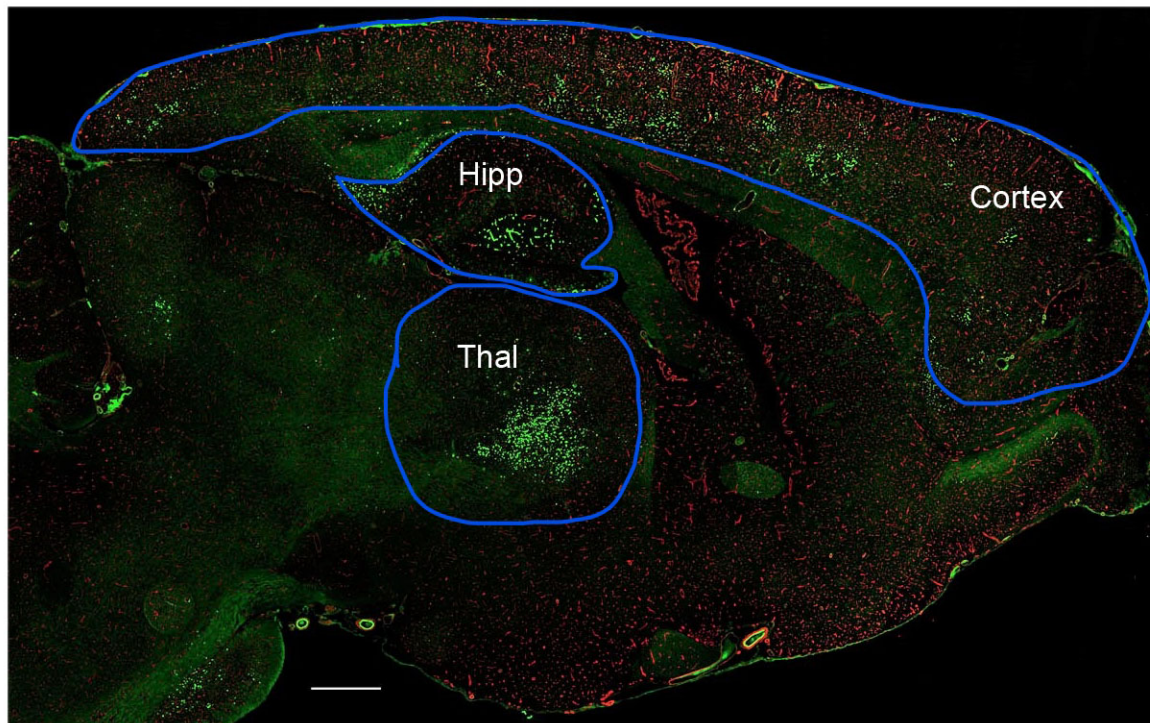

**SI Fig. 4. Collection of distinct brain regions of rTg-DI rats for proteomic analysis.** The cortex, hippocampus and thalamus were collected from fresh frozen rTg-DI and WT rat brain tissue sections using laser capture microdissection as described in ‘Materials and Methods’. The three regions that were collected – Cortex, Hippocampus and Thalamus – are outlined in blue. Scale bar = 1mm.

**Supplemental Fig. S5**

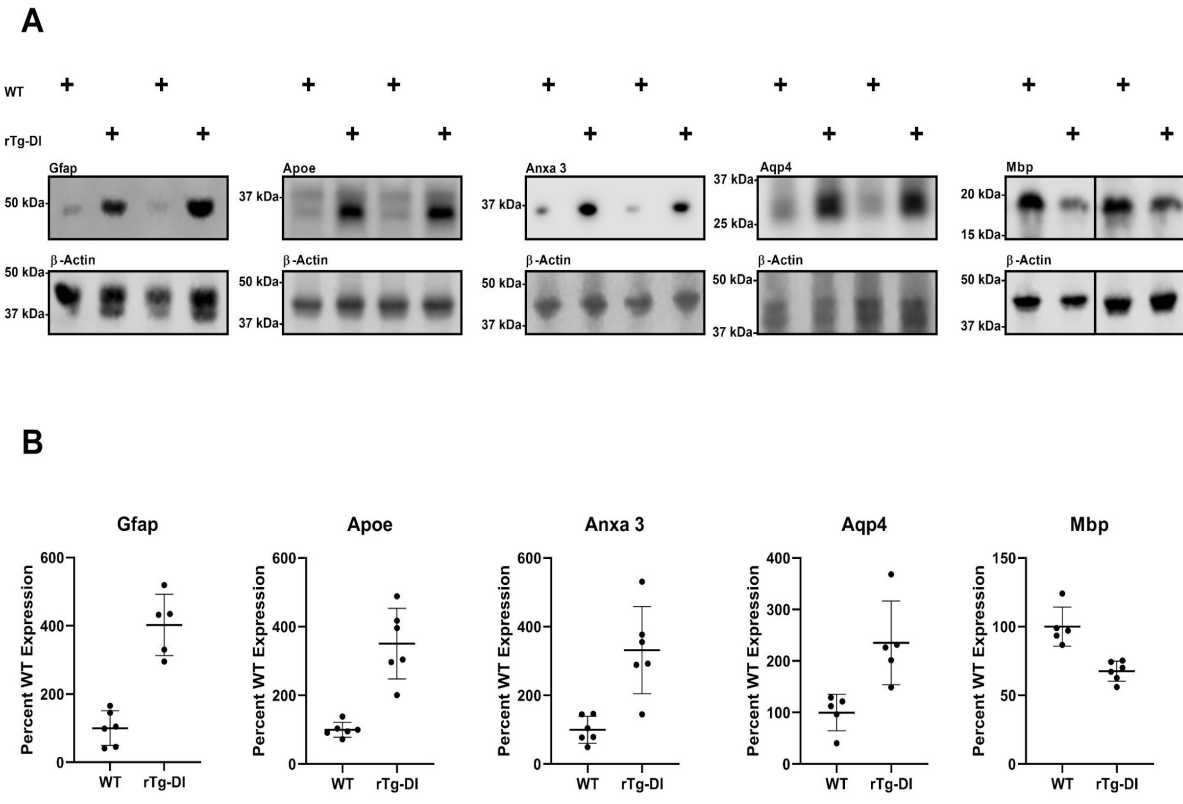

**SI Fig. S5 SWATH-MS Validation by immunoblot.** **A.** Representative lanes from immunoblotting depict the relative whole brain expression in WT and rTg-DI rats of proteins (Gfap, Apoe, Anxa3, Aqp4 and Mbp from left to right) indicated as differentially expressed in rTg-DI rats by SWATH-MS. Relative signal for the proteins of interest (top) was revealed by probing with appropriate primary antibody, and subsequent HRP-conjugated or fluorescent secondary antibody. Relative  $\beta$ -actin signal (bottom) revealed by probing with anti- $\beta$ -actin primary antibody and subsequent fluorescent secondary antibody was used for a loading control, as  $\beta$ -actin is not changed in rTg-DI rats. **B.** Quantification of relative whole brain expression of Gfap, Apoe, Anxa3, Aqp4 and Mbp in WT and rTg-DI rats. Levels of protein

expression visualized in (A) were normalized against the corresponding  $\beta$ -actin signal and reported as a percentage of the WT expression. All depicted proteins displayed significantly different expression in rTg-DI rats as compared to WT, with  $p = 2.99 \times 10^{-5}$  for Gfap,  $p = 8.22 \times 10^{-5}$  for Apoe,  $p = 8.2 \times 10^{-4}$  for Anxa3,  $p = 4.59 \times 10^{-3}$  for Aqp4, and  $p = 4.29 \times 10^{-4}$  for Mbp (student's t test,  $n = 5,6$ ). Individual values are depicted with bars representing the mean  $\pm$  SD.

Supplemental Figure S6

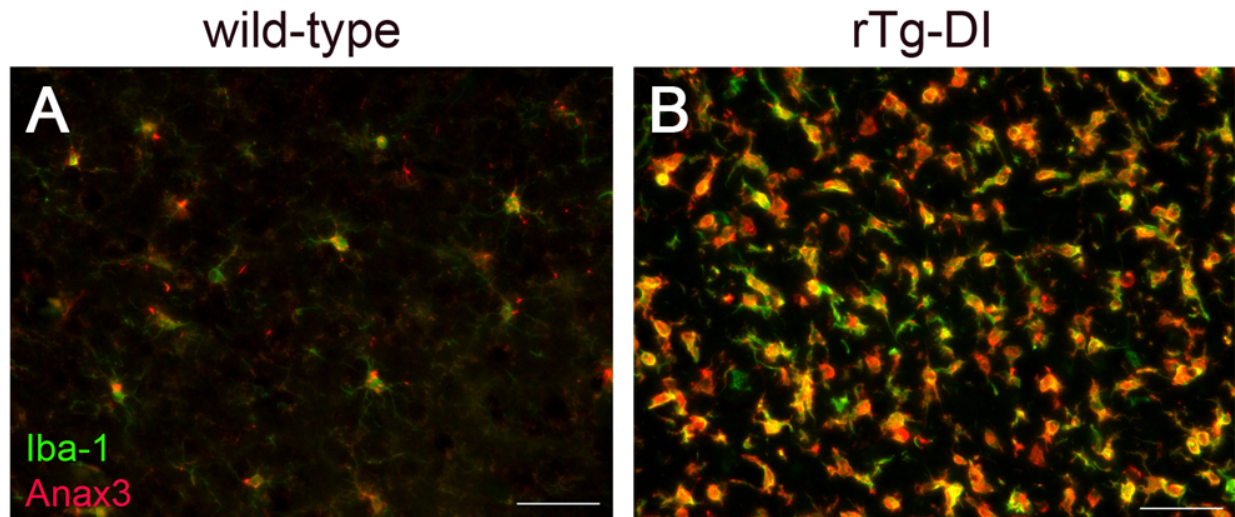

**SI Fig. S6. Co-localization of Anax3 and Iba-1 labeling in microglia in rTg-DI rats.** Brain sections from 12 M wild-type rats (**A**) and rTg-DI rats (**B**) were immunolabeled with a goat polyclonal antibody Iba-1 to identify microglia (green) and rabbit polyclonal antibody to Anax3 (red). The thalamic region of each rat is shown. Scale bars = 50  $\mu$ m. Increased Anax3 immunoreactivity strongly co-localized with Iba-1 labeling of microglia in rTg-DI rats.
